# Supplementary material for: The GH5 1,4-β-mannanase from Bifidobacterium animalis subsp. lactis Bl-04 possesses a low-affinity mannan-binding module and highlights the diversity of mannanolytic enzymes
Source: PubMed Central journal article supplement (PMC4642672; doi:10.1186/s12858-015-0055-4), 2015-11-11
Supplement: 12858_2015_55_MOESM1_ESM.pdf [file 12858_2015_55_MOESM1_ESM.pdf]

| <b>Substrate</b>    | <b>Backbone</b>                                           | <b>Side groups</b>       | <b>Gal:Man ratio<sup>a</sup></b> |
|---------------------|-----------------------------------------------------------|--------------------------|----------------------------------|
| LBG                 | $\beta$ -1,4-Mannosyl                                     | $\alpha$ -1,6-Galactosyl | 1:4                              |
| LBG-lv              | $\beta$ -1,4-Mannosyl                                     | $\alpha$ -1,6-Galactosyl | 1:4                              |
| GG                  | $\beta$ -1,4-Mannosyl                                     | $\alpha$ -1,6-Galactosyl | 1:2                              |
| INM <sup>c</sup>    | $\beta$ -1,4-Mannosyl                                     | –                        | –                                |
| KGM                 | $\beta$ -1,4-Mannosyl, $\beta$ -1,4-glucosyl <sup>b</sup> | Acetyl                   | –                                |
| Avicel <sup>c</sup> | $\beta$ -1,4-Glucosyl                                     | –                        | –                                |

<sup>a</sup> Galactose:mannose ratio, defined as the average number of side group units per backbone unit.  
<sup>b</sup> The mannose:glucose ratio of KGM is approximately 1.6:1 [56].  
<sup>c</sup> INM and Avicel are water-insoluble crystalline or microcrystalline substrates.
