# Supplementary material for: The GH5 1,4-β-mannanase from Bifidobacterium animalis subsp. lactis Bl-04 possesses a low-affinity mannan-binding module and highlights the diversity of mannanolytic enzymes
Source: PubMed Central journal article supplement (PMC4642672; doi:10.1186/s12858-015-0055-4), 2015-11-11
Supplement: 12858_2015_55_MOESM2_ESM.pdf [file 12858_2015_55_MOESM2_ESM.pdf]

| <b>Construct</b>                                                                                                                                                                        | <b>Primer</b>          | <b>Sequence</b>                                |
|-----------------------------------------------------------------------------------------------------------------------------------------------------------------------------------------|------------------------|------------------------------------------------|
| <i>B/Man5_8</i>                                                                                                                                                                         | sense <sup>a</sup>     | CTAG <u>CTAGCGCGGACAATTCGCTCCACGTC</u>         |
|                                                                                                                                                                                         | antisense <sup>a</sup> | <u>CGGGATCCTCAGCGAACCTTGCAGCTCGC</u>           |
| <i>B/Man5_8-ΔCBM10</i>                                                                                                                                                                  | sense <sup>b</sup>     | CTCCAATTCGGTGGCT <u><i>A</i></u> GGGTAACACTGG  |
|                                                                                                                                                                                         | antisense <sup>b</sup> | CCAGTGTTACCC <u><i>T</i></u> AGCCACCGGAATTGGAG |
| <sup>a</sup> The primers are from the 5' ends and the restriction sites are underlined.<br><sup>b</sup> The mutated basepair at position 1013 is underlined and highlighted in italics. |                        |                                                |
