# Supplementary material for: The GH5 1,4-β-mannanase from Bifidobacterium animalis subsp. lactis Bl-04 possesses a low-affinity mannan-binding module and highlights the diversity of mannanolytic enzymes
Source: PubMed Central journal article supplement (PMC4642672; doi:10.1186/s12858-015-0055-4), 2015-11-11
Supplement: 12858_2015_55_MOESM11_ESM.pdf [file 12858_2015_55_MOESM11_ESM.pdf]

| <b>Enzyme</b>          | $k_{\text{cat}}$ (s <sup>-1</sup> ) | $K_m$ (g·L <sup>-1</sup> ) | $k_{\text{cat}}/K_m$ (L·g <sup>-1</sup> ·s <sup>-1</sup> ) | <b>Reference</b> |
|------------------------|-------------------------------------|----------------------------|------------------------------------------------------------|------------------|
| <i>B</i> Man5_8        | 1828                                | 1.58                       | 1157                                                       | Current study    |
| <i>B</i> Man5_8-ΔCBM10 | 2005                                | 1.75                       | 1146                                                       | Current study    |
| <i>Tr</i> Man5A        | 240                                 | 0.6                        | 400                                                        | [30]             |
| <i>Tr</i> Man5A-R171K  | 260                                 | 1.3                        | 200                                                        | [30]             |
| <i>S</i> Man5A         | 197                                 | 3.5                        | 56                                                         | [54]             |
| <i>S</i> Man5A-ΔCBM    | 139                                 | 4.3                        | 32                                                         | [54]             |
| <i>An</i> Man5A        | 330                                 | 2.0                        | 165                                                        | [57]             |
| <i>As</i> Man5A        | 276                                 | 0.93                       | 297                                                        | [58]             |
| <i>Cj</i> Man5A        | 2549                                | 13.9                       | 216                                                        | [22]             |
| <i>Cj</i> Man5B        | 125                                 | 3.0                        | 38                                                         | [22]             |
| <i>Cj</i> Man5C        | 4.1                                 | 8.4                        | 0.53                                                       | [22]             |
| <i>Rm</i> Man26A       | 2702                                | 1.9                        | 1422                                                       | [59]             |
| <i>Ba</i> Man26A-53K   | 444                                 | 21.3                       | 21                                                         | [28]             |
| <i>Cj</i> Man26B       | 259                                 | 3.3                        | 92                                                         | [22]             |
