# Supplementary material for: The GH5 1,4-β-mannanase from Bifidobacterium animalis subsp. lactis Bl-04 possesses a low-affinity mannan-binding module and highlights the diversity of mannanolytic enzymes
Source: PubMed Central journal article supplement (PMC4642672; doi:10.1186/s12858-015-0055-4), 2015-11-11
Supplement: 12858_2015_55_MOESM12_ESM.pdf [file 12858_2015_55_MOESM12_ESM.pdf]

| GenBank ID        | Enzyme                                                                       | Family         | Organism                                                   | CBM10s   |
|-------------------|------------------------------------------------------------------------------|----------------|------------------------------------------------------------|----------|
| AAA26710.2        | <b><math>\beta</math>-1,4-mannanase Man5A</b>                                | <b>GH5</b>     | <i>Streptomyces lividans</i>                               | <b>1</b> |
| AAO31759.1        | <b><math>\beta</math>-1,4-mannanase Man5A</b>                                | <b>GH5</b>     | <i>Cellvibrio japonicus</i>                                | <b>2</b> |
| AAO31761.1        | <b><math>\beta</math>-1,4-mannanase Man5C</b>                                | <b>GH5</b>     | <i>Cellvibrio japonicus</i>                                | <b>1</b> |
| AAP49340.1        | GnuB                                                                         | GH45           | Uncultured bacterium                                       | 1        |
| ABD79328.1        | Endoglucanase                                                                | GH5            | <i>Saccharophagus degradans</i>                            | 1        |
| ABD79911.1        | Endoglucanase                                                                | GH9            | <i>Saccharophagus degradans</i>                            | 1        |
| ABD79912.1        | Putative cellulose-binding protein                                           | Unknown        | <i>Saccharophagus degradans</i>                            | 1        |
| ABD79918.1        | Putative $\beta$ -mannanase                                                  | GH5            | <i>Saccharophagus degradans</i>                            | <b>3</b> |
| ABD81896.1        | Endoglucanase                                                                | GH5            | <i>Saccharophagus degradans</i>                            | 1        |
| ABD82191.1        | $\beta$ -xylanase                                                            | GH10           | <i>Saccharophagus degradans</i>                            | 1        |
| ABD82318.1        | Putative bifunctional xylanase / acetylxylan esterase                        | GH11           | <i>Saccharophagus degradans</i>                            | 1        |
| ABD82675.1        | Endoglucanase                                                                | GH5            | <i>Saccharophagus degradans</i>                            | 1        |
| ABD82946.1        | Putative $\beta$ -mannanase                                                  | GH26           | <i>Saccharophagus degradans</i>                            | 1        |
| <b>ABS72374.1</b> | <b>Bifunctional <math>\beta</math>-1,4-endoglucanase / cellobiohydrolase</b> | <b>GH5 / 6</b> | <i>Teredinibacter turnerae</i>                             | <b>1</b> |
| ABY90130.1        | $\beta$ -1,4-mannanase                                                       | GH5            | <i>Streptomyces</i> sp. s6-204                             | 2        |
| <b>ACE82688.1</b> | <b>Endoglucanase B</b>                                                       | <b>GH45</b>    | <i>Cellvibrio japonicus</i>                                | <b>1</b> |
| ACE83841.1        | Endoglucanase                                                                | GH5            | <i>Cellvibrio japonicus</i>                                | 1        |
| ACE84076.1        | Endoglucanase                                                                | GH5            | <i>Cellvibrio japonicus</i>                                | 1        |
| ACE84179.1        | $\beta$ -1,4-xylanase Xyn11A                                                 | GH11           | <i>Cellvibrio japonicus</i>                                | 1        |
| ACE84239.1        | Cellulose or protein binding domain                                          | Unknown        | <i>Cellvibrio japonicus</i>                                | 1        |
| ACE84745.1        | $\beta$ -1,4-glucanase / xyloglucanase, putative                             | GH74           | <i>Cellvibrio japonicus</i>                                | 1        |
| ACE84760.1        | Chitin binding protein, putative                                             | Unknown        | <i>Cellvibrio japonicus</i>                                | 1        |
| ACE84941.1        | Endoglucanase                                                                | GH5            | <i>Cellvibrio japonicus</i>                                | 1        |
| <b>ACE85439.1</b> | <b><math>\beta</math>-1,4-xylanase A</b>                                     | <b>GH10</b>    | <i>Cellvibrio japonicus</i>                                | <b>1</b> |
| ACE85757.1        | Endoglucanase A                                                              | GH9            | <i>Cellvibrio japonicus</i>                                | 1        |
| ACE85978.1        | Glucanase                                                                    | GH6            | <i>Cellvibrio japonicus</i>                                | 1        |
| ACL28941.1        | $\beta$ -1,4-mannanase                                                       | GH5            | <i>Bifidobacterium animalis</i> subsp. <i>lactis</i> AD011 | 1        |
| ACM94255.1        | Unidentified                                                                 | Unknown        | <i>Bankia gouldi</i>                                       | 1        |
| ACM94257.1        | Unidentified                                                                 | Unknown        | <i>Teredinibacter</i>                                      | 1        |
| ACR11240.1        | Endoglucanase                                                                | GH9            | <i>Teredinibacter turnerae</i>                             | 1        |
| ACR11346.1        | Xylanase / acetylxylan esterase                                              | GH11           | <i>Teredinibacter turnerae</i>                             | 1        |
| ACR11348.1        | GH5 domain protein                                                           | GH5            | <i>Teredinibacter turnerae</i>                             | 3        |
| ACR11748.1        | $\beta$ -xylanase                                                            | GH10           | <i>Teredinibacter turnerae</i>                             | 1        |
| ACR12145.1        | GH5 and GH6 domain protein                                                   | GH5 / 6        | <i>Teredinibacter turnerae</i>                             | 1        |
| ACR12247.1        | Endoglucanase                                                                | GH5            | <i>Teredinibacter turnerae</i>                             | 1        |
| ACR12691.1        | Arabinogalactan endo- $\beta$ -1,4-galactanase                               | GH53           | <i>Teredinibacter turnerae</i>                             | 2        |
| ACR12723.1        | Glucanase                                                                    | GH6            | <i>Teredinibacter turnerae</i>                             | 1        |
| ACR12737.1        | GH16 domain protein                                                          | GH16           | <i>Teredinibacter turnerae</i>                             | 1        |
| ACR12792.1        | GH11 and GH5 domain protein                                                  | GH11 / 5       | <i>Teredinibacter turnerae</i>                             | 1        |
| ACR12952.1        | GH26 domain protein <sup>a</sup>                                             | GH26           | <i>Teredinibacter turnerae</i>                             | <b>2</b> |
| ACR13005.1        | Cellulase                                                                    | GH45           | <i>Teredinibacter turnerae</i>                             | 1        |
| ACR13114.1        | GH16 domain protein                                                          | GH16           | <i>Teredinibacter turnerae</i>                             | 1        |
| ACR13154.1        | Carbohydrate esterase, family3                                               | CE3            | <i>Teredinibacter turnerae</i>                             | 1        |
| ACR13327.1        | GH5 domain protein                                                           | GH5            | <i>Teredinibacter turnerae</i>                             | 1        |
| ACR13418.1        | $\beta$ -xylanase                                                            | GH10           | <i>Teredinibacter turnerae</i>                             | 1        |
| ACR13708.1        | Glucose / sorbosone dehydrogenase domain protein                             | Unknown        | <i>Teredinibacter turnerae</i>                             | 1        |
| ACR13797.1        | Endoglucanase                                                                | GH5            | <i>Teredinibacter turnerae</i>                             | 2        |

|                                                                         |                                                            |            |                                                                   |          |
|-------------------------------------------------------------------------|------------------------------------------------------------|------------|-------------------------------------------------------------------|----------|
| ACR13952.1                                                              | Xylanase / acetylxylan esterase                            | GH11       | <i>Teredinibacter turnerae</i>                                    | 1        |
| ACR14100.1                                                              | CBM33 and 10 domain protein                                | Unknown    | <i>Teredinibacter turnerae</i>                                    | 1        |
| ACR14174.1                                                              | GH74 domain protein                                        | GH74       | <i>Teredinibacter turnerae</i>                                    | 1        |
| ACR14618.1                                                              | O-Glycosyl hydrolase family 30                             | GH30       | <i>Teredinibacter turnerae</i>                                    | 1        |
| ACR14629.1                                                              | Endoglucanase                                              | GH9        | <i>Teredinibacter turnerae</i>                                    | 1        |
| ACR14707.1                                                              | Gluconolactolase domain protein                            | Unknown    | <i>Teredinibacter turnerae</i>                                    | 1        |
| ACR23658.1                                                              | Endoglucanase                                              | GH9        | Bacterium enrichment culture clone Cela20                         | 1        |
| <b>ACS46797.1</b>                                                       | <b>Secreted <math>\beta</math>-mannosidase (mannanase)</b> | <b>GH5</b> | <b><i>Bifidobacterium animalis</i> subsp. <i>lactis</i> BI-04</b> | <b>1</b> |
| ACS48364.1                                                              | Secreted $\beta$ -mannosidase (mannanase)                  | GH5        | <i>Bifidobacterium animalis</i> subsp. <i>lactis</i> DSM 10140    | 1        |
| ACV09865.1                                                              | GH5 domain protein <sup>a</sup>                            | GH5        | <i>Jonesia denitrificans</i>                                      | 2        |
| ACX31080.1                                                              | Endoglucanase                                              | GH9        | <i>Pseudomonas cellulosa</i>                                      | 1        |
| ADC84837.1                                                              | $\beta$ -1,4-mannanase                                     | GH5        | <i>Bifidobacterium animalis</i> subsp. <i>lactis</i> BB-12        | 1        |
| ADG33993.1                                                              | Secreted $\beta$ -mannosidase (mannanase)                  | GH5        | <i>Bifidobacterium animalis</i> subsp. <i>lactis</i> V9           | 1        |
| ADK13057.1                                                              | Endoglucanase                                              | GH5        | <i>Pseudomonas fluorescens</i>                                    | 1        |
| <b>ADK91085.1</b>                                                       | <b><math>\beta</math>-1,4-mannanase</b>                    | <b>GH5</b> | <b><i>Streptomyces</i> sp. S27</b>                                | <b>1</b> |
| ADT88758.1                                                              | $\beta$ -1,4-mannanase                                     | GH5        | <i>Vibrio furnissii</i>                                           | 2        |
| BAA25188.1                                                              | $\beta$ -1,4-mannanase                                     | GH5        | <i>Vibrio</i> sp. MA138                                           | 2        |
| BAB79290.2                                                              | $\beta$ -1,4-mannanase                                     | GH5        | <i>Pseudomonas</i> sp. ND137                                      | 3        |
| BAH23806.1                                                              | $\beta$ -1,4-mannanase                                     | GH5        | <i>Bifidobacterium animalis</i> subsp. <i>lactis</i>              | 1        |
| CAA20610.1                                                              | Secreted $\beta$ -mannosidase (mannanase)                  | GH5        | <i>Streptomyces coelicolor</i>                                    | 1        |
| <b>CAA43597.1</b>                                                       | <b>Endoglucanase C</b>                                     | <b>GH5</b> | <b><i>Cellvibrio japonicus</i></b>                                | <b>1</b> |
| CAA88761.1                                                              | $\beta$ -1,4-xylanase                                      | GH11       | <i>Cellvibrio mixtus</i>                                          | 1        |
| <sup>a</sup> Predicted $\beta$ -mannanases according to BLAST analysis. |                                                            |            |                                                                   |          |
